# Supplementary material for: Intraspecific variation for heat stress tolerance in wild emmer-derived durum wheat populations
Source: Front Plant Sci. 2025 Jan 23;16:1523562. doi: 10.3389/fpls.2025.1523562 (PMC11798995; doi:10.3389/fpls.2025.1523562)
Supplement: Supplementary file 3 [file Table1.xlsx]

## Sheet: Sheet1
	Supplementary Table 1. List of the wild emmer dervative (WED) families used in the study. The recurrent parent 'Miki 3' is a durum wheat cultivar, the other nine parents (with code KU) are wild emmer wheat accessions.
	Number	Family 1	Family 2	Family 3	Family 4	Family 5	Family 6	Family 7	Family 8	Family 9
		KU-108-1*2/Miki 3	KU-108-4*2/ Miki 3	KU-108-5*2/ Miki 3	KU-8808*2/ Miki 3	KU-8810*2/Miki 3	KU-8814*2/ Miki 3	KU-8815*2/ Miki 3	KU-14774*2/ Miki 3	KU-14532*2/ Miki 3
	1	MDL004	MDL009	MDL003	MDL011	MDL031	MDL008	MDL006	MDL001	MDL047
	2	MDL007	MDL013	MDL005	MDL015	MDL035	MDL010	MDL038	MDL002	MDL053
	3	MDL037	MDL020	MDL016	MDL018	MDL086	MDL012	MDL103	MDL014	MDL063
	4	MDL040	MDL022	MDL017	MDL023	MDL093	MDL019	MDL143	MDL028	MDL066
	5	MDL054	MDL032	MDL041	MDL024	MDL118	MDL021	MDL148	MDL033	MDL068
	6	MDL090	MDL049	MDL045	MDL025	MDL125	MDL026	MDL156	MDL034	MDL082
	7	MDL094	MDL061	MDL055	MDL029	MDL133	MDL027	MDL174	MDL036	MDL083
	8	MDL110	MDL064	MDL067	MDL030	MDL153	MDL044		MDL046	MDL112
	9	MDL119	MDL095	MDL072	MDL039	MDL155	MDL050		MDL048	MDL116
	10	MDL138	MDL102	MDL077	MDL042		MDL058		MDL051	MDL117
	11	MDL142	MDL126	MDL104	MDL056		MDL059		MDL052	MDL131
	12	MDL169	MDL114	MDL107	MDL062		MDL065		MDL057	MDL152
	13	MDL176	MDL161	MDL120	MDL071		MDL070		MDL060	MDL181
	14		MDL168	MDL121	MDL081		MDL073		MDL069
	15		MDL175	MDL127	MDL084		MDL078		MDL075
	16		MDL178	MDL128	MDL100		MDL079		MDL089
	17			MDL141	MDL105		MDL080		MDL091
	18			MDL145	MDL109		MDL085		MDL096
	19			MDL162	MDL115		MDL087		MDL097
	20			MDL165	MDL132		MDL088		MDL101
	21			MDL166	MDL144		MDL092		MDL122
	22			MDL172	MDL150		MDL098		MDL123
	23				MDL151		MDL099		MDL134
	24				MDL160		MDL106		MDL135
	25				MDL170		MDL108		MDL140
	26				MDL173		MDL111		MDL147
	27				MDL179		MDL113		MDL154
	28						MDL129		MDL157
	29						MDL130		MDL158
	30						MDL136		MDL159
	31						MDL137		MDL164
	32						MDL139		MDL167
	33						MDL146		MDL171
	34						MDL149
	35						MDL177
	36						MDL180
	37						MDL182

## Sheet: Sheet2
							Code
							F1-110
							F1-119
							F1-138
							F1-142
							F1-169
							F1-176
							F1-37
							F1-4
							F1-40
							F1-54
							F1-7
							F1-90
							F1-94
