# Supplementary material for: Intraspecific variation for heat stress tolerance in wild emmer-derived durum wheat populations
Source: Front Plant Sci. 2025 Jan 23;16:1523562. doi: 10.3389/fpls.2025.1523562 (PMC11798995; doi:10.3389/fpls.2025.1523562)
Supplement: Supplementary file 4 [file Table2.xlsx]

## Sheet: Sheet1
	Supplementary Table 2. Means and ranges of traits for the wild emmer derivative (WED) families evaluated at Tottori (TOT), Dongola (DON), Wad Medani normal sowing date (NSD), and Wad Medani late sowing date (LSD) during season 2019–2020.
	Family 1
			TOT				DON				NSD				LSD
	Trait		Miki 3	Mean	Range		Miki 3	Mean	Range		Miki 3	Mean	Range		Miki 3	Mean	Range
	DH		144	138.9	125.5–146.0		68	72.5	68.0–84.0		67.5	72.8	66.0–87.0		67	68.1	61.0–77.0
	DM		177.5	179.6	177.0–183.0		110	113.8	105.0–123.0		104	106.8	102.0–120.0		97.5	98.5	92.0–108.0
	GFD		33.5	40.6	33.0–52.0		42	41.3	35.0–50.5		36.5	34	31.0–39.5		30.5	30.42	27.0–33.0
	PHT		64.5	61.5	38.3–77.8		83	99.9	78.0–118.5		75	82.7	70.8–91.6		76.6	77.9	66.6–86.7
	CHLH		50.5	52.4	44.3–58.1		47.8	46.9	38.4–52.8		47.7	51.5	44.3–53.5		44.7	44.5	41.6–49.01
	CHLM		49.4	50.3	39.7–58.4		11.4	14.4	3.8–31.3		31.2	34.4	30.8–37.8		33	32.4	30.0–36.6
	CHLD		NA	NA	NA		NA	NA	NA		34.4	32.4	16.8–36.9		26.1	26.2	21.8–33.4
	CTH		NA	NA	NA		15.8	16.5	12.1–19.8		23.5	24.6	19.9–28.3		25.5	25.8	21.6–28.1
	SN		43	43	31.0–66.7		36	29	16.5–40.0		39	25.7	13.9–35.7		29	17.5	8.4–27.3
	TKW		52.5	48.3	39.2–54.9		44.4	44.5	34.2–55.1		46.4	38.7	30.2–44.1		35.4	32	14.5–42.4
	HI		26.9	28.3	25.2–34.1		38.1	33.6	24.9–74.6		26.4	22.5	16.4–31.5		20.5	16	11.8–33.1
	BIO		14506	17423	12694.0–22744.0		16875	11982	8130.0–16321.0		10626	7836	2999.0–11573.0		7106	4172	1750.0–7731.0
	GY		4176	4947	3508.0–7499.0		2844	3768	2156.0–5405.0		2747	1663	599.0–2452.0		1449	649	328.0–1426.0
	Family 2
			TOT				DON				NSD				LSD
	Trait		Miki 3	Mean	Range		Miki 3	Mean	Range		Miki 3	Mean	Range		Miki 3	Mean	Range
	DH		144	137.8	130.0–144.5		68	69.7	64.0–79.0		67.5	68.8	57.0–83.0		67	66.8	60.0–82.0
	DM		177.5	178.5	174.0–181.0		110	112.3	106.0–117.0		104	105.2	91.0–117.0		97.5	97	92.0–110.0
	GFD		33.5	40.7	34.5–48.5		42	42.6	37.0–47.0		36.5	36.3	32.0–49.0		30.5	30.2	33.5–35.5
	PHT		64.5	63.7	49.8–87.2		83	93.8	79.5–117.0		75	81.2	69.2–101.7		76.6	74.8	64.1–88.4
	CHLH		50.5	54.7	49.7–60.8		47.8	49.7	36.2–62.4		47.7	55	43.9–52.2		44.7	44.6	40.9–56.4
	CHLM		49.4	49.7	36.9–85.3		11.4	15.9	5.0–34.5		31.2	34	30.8–39.9		33	33.1	30.6–43.1
	CHLD		NA	NA	NA		NA	NA	NA		34.4	38.1	19.1–36.3		26.1	26.1	20.0–31.2
	CTH		NA	NA	NA		15.8	16.5	12.3–21.7		23.5	24.6	21.5–32.7		25.5	25.7	20.7–29.9
	SN		43	42	32.3–57.7		36	31.2	17.1–46.3		39	31.6	18.1–46.6		29	21.3	30.6–43.1
	TKW		52.5	49.9	42.5–63.2		44.4	41.1	16.2–50.9		46.4	41.8	30.8–54.7		35.4	35.7	27.5–46.0
	HI		26.9	29.4	23.7–34.8		38.1	30.8	18.3–58.2		26.4	24.5	12.5–31.3		20.5	19.2	9.7–31.3
	BIO		14506	19684	14247.0–23740.0		16875	13142	8756.0–19377.0		10626	7887	3248.0–13506.0		7106	4632	750.0–8250.0
	GY		4176	5822	3799.0–7944.0		2844	3967	2125.0–5406.0		2747	1949	596.0–3370.0		1449	810	214.0–1669.0
	Family 3
			TOT				DON				NSD				LSD
	Trait		Miki 3	Mean	Range		Miki 3	Mean	Range		Miki 3	Mean	Range		Miki 3	Mean	Range
	DH		144	135.6	129.5–146.0		68	73	66.0–90.5		67.5	70.4	64.0–74.0		67	66.7	61.0–71.0
	DM		177.5	179	175.0–183.0		110	113.4	105.0–126.0		104	104.6	97.0–111.0		97.5	96.5	91.0–102.0
	GFD		33.5	43.4	34.0–52.0		42	40.5	35.0–48.0		36.5	34.2	29.0–41.0		30.5	29.8	27.0–34.5
	PHT		64.5	60.5	48.5–76.3		83	95.4	81.5–119.5		75	80.6	69.2–99.2		76.6	75.6	60.8–89.2
	CHLH		50.5	54.1	44.6–62.2		47.8	49.1	33.6–58.2		47.7	53.2	42.0–52.4		44.7	44.1	41.5–52.1
	CHLM		49.4	48.2	38.7–62.0		11.4	18	3.6–53.1		31.2	34.02	30.5–42.1		33	33.1	30.9–36.7
	CHLD		NA	NA	NA		NA	NA	NA		34.4	34.7	17.4–36.6		26.1	26.3	19.8–36.7
	CTH		NA	NA	NA		15.8	16.8	12.7–22.9		23.5	23	17.7–22.7		25.5	25.8	21.9–29.4
	SN		43	35.8	18.4–53.7		36	31.8	18.3–47.9		39	32.4	19.8–41.4		29	23.3	11.7–35.2
	TKW		52.5	48.7	42.2–57.1		44.4	43.3	33.9–56.3		46.4	40.5	29.4–48.0		35.4	34.1	23.4–44.8
	HI		26.9	25.7	12.4–42.3		38.1	30.3	15.1–49.7		26.4	24.3	8.9–35.8		20.5	17.7	11.0–36.6
	BIO		14506	16109	10000.0–26495.0		16875	13333	8078.0–22506.0		10626	8727	4206.0–12565.0		7106	4913	2368.0–7312.0
	GY		4176	4266	1813.0–6574.0		2844	3765	2156.0–5344.0		2747	2037	684.0–3437.0		1449	865	448.0–2215.0
	Family 4
			TOT				DON				NSD				LSD
	Trait		Miki 3	Mean	Range		Miki 3	Mean	Range		Miki 3	Mean	Range		Miki 3	Mean	Range
	DH		144	135.5	123.5–146.0		68	71.6	62.0–82.0		67.5	70.4	57.0–91.0		67	66.6	58.4–73.5
	DM		177.5	179	173.0–181.0		110	113.4	106.0–120.0		104	104.1	94.0–122.0		97.5	97.2	90.4–102.5
	GFD		33.5	42.1	31.0–54.5		42	40.3	33.0–47.0		36.5	33.8	28.0–41.0		30.5	60.6	27.4–33.5
	PHT		64.5	64.3	52.5–76.8		83	93.6	75.5–119.5		75	82.1	69.1–102.5		76.6	74	67.5–88.3
	CHLH		50.5	53.7	46.3–59.4		47.8	49.2	19.6–39.4		47.7	52.8	41.6–53.4		44.7	43.7	41.6–45.8
	CHLM		49.4	47.5	39.3–57.6		11.4	17.4	35.1–60.6		31.2	34.2	29.9–38.9		33	32.3	30.1–33.9
	CHLD		NA	NA	NA		NA	NA	NA		34.4	35.1	16.8–39.6		26.1	26	21.5–32.4
	CTH		NA	NA	NA		15.8	17.88	12.5–25.4		23.5	23.5	19.2–29.4		25.5	25.2	21.8–30.3
	SN		43	40.3	21.1–67.6		36	31.8	19.6–39.4		39	30.6	12.0–47.4		29	24.7	6.5–38.4
	TKW		52.5	48.4	33.8–56.7		44.4	43.3	31.2–51.2		46.4	39.7	30.3–50.2		35.4	34.2	15.2–41.7
	HI		26.9	27.3	18.7–37.3		38.1	27.2	8.1–47.6		26.4	25.9	9.8–40.1		20.5	17	9.3–31.2
	BIO		14506	18487	10997.0–28499.0		16875	13429	6877.0–20007.0		10626	8335	2624.0–10880.0		7106	5670	1739.0–10907.0
	GY		4176	5139	2757.0–10666.0		2844	3763	906.0–5658.0		2747	2057	937.0–3167.0		1449	917	180.0–1750.0
	Family 5
			TOT				DON				NSD				LSD
	Trait		Miki 3	Mean	Range		Miki 3	Mean	Range		Miki 3	Mean	Range		Miki 3	Mean	Range
	DH		144	134.4	129.0–140.0		68	71	65.0–77.0		67.5	67.1	57.0–83.0		67	66.1	60.0–74.0
	DM		177.5	177	173.0–179.0		110	109	105.0–115.0		104	101	92.0–104.0		97.5	95.4	90.5–103.5
	GFD		33.5	42.3	35.0–47.5		42	39	37.0–42.0		36.5	33.6	21.1–41.0		30.5	29.3	22.5–33.0
	PHT		64.5	65.2	52.1–76.5		83	93.7	74.9–112.5		75	81.7	73.5–94.2		76.6	74.9	59.2–92.6
	CHLH		50.5	55.4	53.2–57.4		47.8	41.8	22.3–50.2		47.7	52.2	43.2–53.3		44.7	43	40.5–46.8
	CHLM		49.4	50	41.5–57.7		11.4	11.4	3.2–27.5		31.2	35.6	32.6–35.8		33	32.6	31.0–38.2
	CHLD		NA	NA	NA		NA	NA	NA		34.4	31.1	17.7–36.8		26.1	25.5	19.1–28.6
	CTH		NA	NA	NA		15.8	17.4	13.9–23.1		23.5	22.9	19.3–28.9		25.5	24.6	21.7–26.5
	SN		43	42.6	35.1–51.0		36	30	24.1–39.6		39	26.7	18.0–31.8		29	20.1	9.0–28.6
	TKW		52.5	47.9	42.0–53.9		44.4	40	25.5–53.2		46.4	40.1	28.3–50.3		35.4	34.3	25.4–41.4
	HI		26.9	30.8	22.6–35.0		38.1	29	18.5–49.1		26.4	30.4	23.7–42.9		20.5	14.3	12.4–28.5
	BIO		14506	18095	13258.0–23749.0		16875	12160	5635.0–23126.0		10626	7270	4237.0–11440.0		7106	6021	2681.0–8688.0
	GY		4176	5566	3017.0–8166.0		2844	3206	1594.0–4688.0		2747	2185	792.0–3739.0		1449	908	305.0–1598.0
	Family 6
			TOT				DON				NSD				LSD
	Trait		Miki 3	Mean	Range		Miki 3	Mean	Range		Miki 3	Mean	Range		Miki 3	Mean	Range
	DH		144	138	126.0–147.0		68	72.4	64.0–85.0		67.5	71	59.0–94.0		67	67.2	59.0–84.0
	DM		177.5	178	173.0–184.0		110	111.2	104.0–120.0		104	104	91.0–126.0		97.5	97	91.0–114.0
	GFD		33.5	39.7	31.0–48.5		42	38.8	34.5–47.5		36.5	33	26.0–39.0		30.5	29.6	25.0–33.0
	PHT		64.5	65.4	45.6–86.7		83	96	73.5–125.5		75	84.3	65.0–110.1		76.6	75.8	62.5–90.0
	CHLH		50.5	52.4	43.2–63.0		47.8	46.2	21.8–59.7		47.7	52.3	38.4–54.2		44.7	44.4	41.5–53.4
	CHLM		49.4	48.1	37.1–61.0		11.4	11.4	3.5–46.1		31.2	35.1	30.7–38.6		33	31.8	30.6–39.4
	CHLD		NA	NA	NA		NA	NA	NA		34.4	33.6	3.5–37.1		26.1	25.8	19.6–30.2
	CTH		NA	NA	NA		15.8	18	13.7–29.3		23.5	23.2	19.5–33.2		25.5	25.1	20.9–31.1
	SN		43	42.8	32.8–58.6		36	30.5	19.8–41.9		39	30.4	13.7–46.8		29	21.2	7.2–47.5
	TKW		52.5	49.6	44.1–56.8		44.4	42.4	28.7–50.5		46.4	40.7	20.2–49.0		35.4	33.6	23.2–43.0
	HI		26.9	28.1	15.4–37.0		38.1	27.7	17.9–87.7		26.4	19.6	5.5–41.6		20.5	15.2	7.7–32.9
	BIO		14506	16644	8246.0–25623.0		16875	11848	7503.0–20695.0		10626	8959	3687.0–12178.0		7106	5382	1750.0–11106.0
	GY		4176	4686	2016.0–6688.0		2844	3843	2844.0–6000.0		2747	2011	321.0–3717.0		1449	868	308.0–2150.0
	Family 7
			TOT				DON				NSD				LSD
	Trait		Miki 3	Mean	Range		Miki 3	Mean	Range		Miki 3	Mean	Range		Miki 3	Mean	Range
	DH		144	134	130.0–144.0		68	72.5	69.0–78.0		67.5	70.5	68.0–76.0		67	65.6	62.0–73.0
	DM		177.5	175.7	172.5–177.5		110	111.4	106.0–114.0		104	103.9	102.0–106.0		97.5	96.2	93.5–102.5
	GFD		33.5	41.5	32.0–46.5		42	38.9	35.0–44.0		36.5	33.4	29.0–36.5		30.5	30.6	29.0–33.0
	PHT		64.5	65.7	59.5–72.1		83	94.3	79.0–107.0		75	86.1	79.2–90.8		76.6	72.9	63.3–79.1
	CHLH		50.5	50.6	44.3–56.2		47.8	47.6	37.6–54.0		47.7	52.7	46.0–49.7		44.7	44.4	40.2–45.7
	CHLM		49.4	39.5	26.6–47.0		11.4	14.7	5.1–26.2		31.2	35.3	31.3–37.9		33	31.7	30.2–33.2
	CHLD		NA	NA	NA		NA	NA	NA		34.4	33.7	19.6–34.5		26.1	25.9	23.4–30.0
	CTH		NA	NA	NA		15.8	16.4	12.6–19.2		23.5	22.8	19.8–28.0		25.5	25	23.5–26.8
	SN		43	33.8	16.2–50.1		36	28.2	16.8–39.1		39	35.7	19.3–58.5		29	23.9	16.6–34.3
	TKW		52.5	43.8	36.1–52.0		44.4	43.2	39.6–49.4		46.4	41.5	35.5–48.6		35.4	36.6	26.7–43.8
	HI		26.9	26.5	14.2–36.2		38.1	27.7	19.0–41.0		26.4	20	8.5–34.4		20.5	15.2	8.8–20.2
	BIO		14506	14681	10495.0–22754.0		16875	11848	8759.0–18130.0		10626	8959	6060.0–11385.0		7106	5382	3065.0–6813.0
	GY		4176	4016	1770.0–7060.0		2844	3056	1844.0–4000.0		2747	1609	599.0–2996.0		1449	860	432.0–1246.0
	Family 8
			TOT				DON				NSD				LSD
	Trait		Miki 3	Mean	Range		Miki 3	Mean	Range		Miki 3	Mean	Range		Miki 3	Mean	Range
	DH		144	138	131.0–145.0		68	72.1	64.0–79.0		67.5	71.6	68.0–76.0		67	67.8	60.0–74.0
	DM		177.5	179.1	175.0–181.0		110	113.3	105.0–120.0		104	106	102.0–106.0		97.5	98.1	90.0–104.0
	GFD		33.5	41.1	32.0–47.0		42	41.2	19.0–46.0		36.5	34.3	29.0–36.5		30.5	30.3	25.9–34.0
	PHT		64.5	61.5	49.8–90.9		83	100	84.5–131.5		75	82.7	79.2–90.8		75.6	74	57.5–89.2
	CHLH		50.5	53.8	45.9–60.8		47.8	45.6	26.7–57.4		47.7	52.7	46.0–49.7		44.7	44.3	40.0–49.0
	CHLM		49.4	48.2	30.0–56.6		11.4	17.2	4.3–39.9		31.2	34.8	31.3–37.9		33	31.9	30.4–37.2
	CHLD		NA	NA	NA		NA	NA	NA		34.4	33.8	12.3–37.1		26.1	27.2	22.3–33.0
	CTH		NA	NA	NA		15.8	17.2	12.4–26.5		23.5	23.6	20.3–28.6		25.5	25.5	21.5–29.8
	SN		43	38.8	23.9–62.0		36	30	19.0–46.0		39	32.3	19.3–58.5		29	20.7	6.2–37.4
	TKW		52.5	49.2	34.3–61.3		44.4	44.3	33.4–56.5		46.4	41.2	35.5–48.6		35.4	32.4	22.2–45.3
	HI		26.9	27.7	16.2–35.8		38.1	27.6	19.9–60.4		26.4	26.3	8.5–34.4		20.5	16	5.5–23.2
	BIO		14506	17271	9747.0–25005.0		16875	12641	3750.0–19382.0		10626	8306	6060.0–11385.0		7106	4895	1116.0–10108.0
	GY		4176	4845	2363–8145		2844	3560	1687.0–6031.0		2747	2063	599–2996		1449	828	60.0–2019.0
	Family 9
			TOT				DON				NSD				LSD
	Trait		Miki 3	Mean	Range		Miki 3	Mean	Range		Miki 3	Mean	Range		Miki 3	Mean	Range
	DH		144	133	124.0–145.0		68	70	66.0–74.0		67.5	69.1	64.0–82.0		67	65.4	61.5–71.5
	DM		177.5	178	174.0–181.0		110	111	108.0–115.0		104	104.2	101.0–115.0		97.5	95.3	92.0–99.0
	GFD		33.5	45	36.0–51.0		42	41	38.0–46.0		36.5	35.1	32.0–37.0		30.5	30	25.5–33.5
	PHT		64.5	64	42.2–83.2		83	101	90.0–116.0		75	83	67.5–98.3		76.6	76.5	57.5–90.0
	CHLH		50.5	51.2	44.5–54.6		47.8	46.5	39.8–57.3		47.7	53.7	44.2–51.2		44.7	43.8	41.7–46.5
	CHLM		49.4	46.7	37.4–58.7		11.4	11	4.8–29.6		31.2	35.4	31.1–37.9		33	32.2	31.0–33.2
	CHLD		NA	NA	NA		NA	NA	NA		34.4	33.6	18.6–35.4		26.1	26.2	23.0–30.2
	CTH		NA	NA	NA		15.8	17.2	41.4–20.4		23.5	22.8	19.7–25.5		25.5	25.2	21.8–29.4
	SN		43	39.8	27.0–48.0		36	33.4	28.1–42.0		39	34.1	24.7–45.1		29	23.9	6.7–34.0
	TKW		52.5	48	41.5–54.6		44.4	46.3	39.4–55.4		46.4	43.3	33.2–52.6		35.4	34.9	23.6–43.8
	HI		26.9	28.3	22.1–40.5		38.1	29.5	19.5–49.8		26.4	26.1	17.9–43.6		20.5	18.5	11.5–28.2
	BIO		14506	15866	7496.0–26748.0		16875	13419	9383.0–18124.0		10626	8985	4822.0–13066.0		7106	5234	3438.0–8908.0
	GY		4176	4701	2203.0–7679.0		2844	3872	2719.0–5405.0		2747	2192	1225.0–4174.0		1449	978	482.0–2166.0
	DH, days to heading; DM, days to maturity; GFD, grain filling duration; PHT, plant height; CHLH, chlorophyll at heading; CHLM, chlorophyll at maturity; CHLD, chlorophyll degradation; CTH, canopy temperature at heading; SN, seed number/spike; TKW, thousand kernel weight; HI, harvest index; BIO, biomass; GY, grain yield.
