# Supplementary material for: Intraspecific variation for heat stress tolerance in wild emmer-derived durum wheat populations
Source: Front Plant Sci. 2025 Jan 23;16:1523562. doi: 10.3389/fpls.2025.1523562 (PMC11798995; doi:10.3389/fpls.2025.1523562)
Supplement: Supplementary file 5 [file Table3.xlsx]

## Sheet: Sheet1
	Supplementary Table 3. Restricted maximum likelihood variance components analysis for 12 traits evaluated by nine wild emmer derivative families in Tottori, Dongola, Wad Medani normal sowing date and Wad Medani late sowing date.
	Trait	Source of variation	n.d.f	d.d.f	Wald statistic	F-value	SE±
	DH	Family (F)	8	1354.9	54.78	6.85***	0.6722
		Environment (E)	3	4	67953.3	22650.9***	0.3886
		F × E	24	1356.5	27.13	1.13ns	1.325
	DM	Family (F)	8	1348	79.26	9.91***	0.5407
		Environment (E)	3	4	19565.3	6521.78***	0.6785
		F × E	24	1349.1	15.76	0.66ns	1.192
	GFD	Family (F)	8	1350.9	52.18	6.52***	0.5033
		Environment (E)	3	4	327.32	109.11***	0.7514
		F × E	24	1352.2	51.83	2.16***	1.165
	PHT	Family (F)	8	1339.5	17.59	2.2*	1.386
		Environment (E)	3	4	343.07	114.36***	1.852
		F × E	24	1340.3	25.82	1.08ns	3.106
	CHLH	Family (F)	8	1324.4	25.11	3.14**	0.7515
		Environment (E)	3	4	64.11	21.37**	1.417
		F × E	24	1325.9	38.26	1.59*	1.893
	CHLM	Family (F)	8	1345.8	14.04	1.76ns	0.9961
		Environment (E)	3	4	209.07	69.69***	2.337
		F × E	24	1346.8	54.56	2.27***	2.77
	CHLD	Family (F)	8	632.9	13.8	1.7ns	1.033
		Environment (E)	1	2	18	18.0*	1.898
		F × E	8	633.2	14.2	1.7ns	1.933
	SN	Family (F)	8	1330.6	16.91	2.11*	1.109
		Environment (E)	3	4	175.76	58.59***	1.427
		F × E	24	1331.5	66.22	2.76***	2.46
	TKW	Family (F)	8	1339.9	10.41	1.3ns	0.8369
		Environment (E)	3	4	241.55	80.52***	1.014
		F × E	24	1341.4	39.58	1.65*	1.829
	HI	Family (F)	8	1325.8	13.5	1.69ns	1.03
		Environment (E)	3	4	63.43	21.14**	1.699
		F × E	24	1328.3	38.57	1.61*	2.465
	BIO	Family (F)	8	1329.1	13.74	1.72ns	451.6
		Environment (E)	3	4	57.33	19.11**	1722
		F × E	24	1329.5	44.83	1.87**	1692
	GY	Family (F)	8	1363.3	25.58	2.84**	129.3
		Environment (E)	3	4	304.51	101.5***	178.8
		F × E	24	1363.8	60.8	2.25***	258.7
	*, **, ***, and ns indicate F-probability values less than 0.05, 0.01, 0.001 and non-significant, respectively. DH, days to heading; DM, days to maturity; GFD, grain filling duration; PHT, plant height; CHLH, chlorophyll at heading; CHLM, chlorophyll at maturity; CHLD, chlorophyll degradation; SN, seed number/spike; TKW, thousand kernel weight; HI, harvest index; BIO, biomass; GY, grain yield. n.…
