# Supplementary material for: Intraspecific variation for heat stress tolerance in wild emmer-derived durum wheat populations
Source: Front Plant Sci. 2025 Jan 23;16:1523562. doi: 10.3389/fpls.2025.1523562 (PMC11798995; doi:10.3389/fpls.2025.1523562)
Supplement: Supplementary file 6 [file Table4.xlsx]

## Sheet: Sheet1
Supplementary Table 4. The best top 25 lines and their families of the AMMI model, the ratio of each family in the four environments, and the top stable 25 lines across four environments from the AMMI model. Environments used to evaluate the wild emmer derivative families are Tottori, (TOT), Dongola (DON), Wad Medani normal sowing date (NSD), and Wad Medani late sowing date (LSD) during season 20…
	The best top 25 progenies, their families, and the ratio of each family in four environments												The top 25 progenies			The top stable 25 progenies
	TOT			DON			NSD			LSD			All environments
Rank	Family/Progeny	Familiy	Ratio %	Family/Progeny	Familiy	Ratio %	Family/Progeny	Familiy	Ratio %	Family/Progeny	Familiy	Ratio %	Family/Progeny	Family	Ratio %	Rank	Family/Progeny	Stability (ASV)	Familiy	Ratio %
1	Family 4-MDL025	Family 1	16	Family 1-MDL110	Family 1	4	Family 9-MDL047	Family 1	8	Family 6-MDL085	Family 1	8	Family 8-MDL157	Family 1	12	1	Family 5-MDL153	2.41	Family 1	8
2	Family 9-MDL117	Family 2	4	Family 8-MDL157	Family 2	8	Family 4-MDL062	Family 2	4	Family 1-MDL119	Family 2	8	Family 4-MDL025	Family 2	8	2	Family 8-MDL052	2.63	Family 2	8
3	Family 1-MDL090	Family 3	4	Family 6-MDL080	Family 3	16	Family 6-MDL085	Family 3	4	Family 9-MDL047	Family 3	4	Family 1-MDL119	Family 3	12	3	Family 9-MDL131	2.82	Family 3	0
4	Family 8-MDL159	Family 4	28	Family 6-MDL129	Family 4	8	Family 1-MDL119	Family 4	20	Family 6-MDL073	Family 4	28	Family 6-MDL085	Family 4	12	4	Family 8-MDL134	3.13	Family 4	16
5	Family 4-MDL115	Family 5	0	Family 3-MDL003	Family 5	0	Family 6-MDL058	Family 5	12	Family 4-MDL062	Family 5	12	Family 4-MDL081	Family 5	8	5	Family 6-MDL027	3.45	Family 5	12
6	Family 4-MDL024	Family 6	12	Family 7-MDL174	Family 6	36	Family 6-MDL073	Family 6	24	Family 6-MDL111	Family 6	24	Family 8-MDL164	Family 6	16	6	Family 8-MDL048	3.65	Family 6	24
7	Family 4-MDL173	Family 7	8	Family 6-MDL113	Family 7	8	Family 4-MDL084	Family 7	4	Family 1-MDL094	Family 7	0	Family 4-MDL115	Family 7	0	7	Family 6-MDL050	3.71	Family 7	0
8	Family 7-MDL174	Family 8	20	Family 7-MDL143	Family 8	16	Family 6-MDL111	Family 8	12	Family 6-MDL058	Family 8	12	Family 1-MDL094	Family 8	24	8	Family 2-MDL114	3.95	Family 8	24
9	Family 3-MDL162	Family 9	8	Family 3-MDL041	Family 9	4	Family 1-MDL094	Family 9	12	Family 5-MDL086	Family 9	8	Family 3-MDL162	Family 9	8	9	Family 1-MDL169	4.14	Family 9	8
10	Family 8-MDL157			Family 4-MDL081			Family 5-MDL086			Family 4-MDL084			Family 2-MDL175			10	Family 8-MDL164	4.31
11	Family 2-MDL020			Family 4-MDL179			Family 4-MDL071			Family 5-MDL035			Family 1-MDL110			11	Family 1-MDL007	4.51
12	Family 6-MDL092			Family 6-MDL130			Family 8-MDL036			Family 5-MDL155			Family 8-MDL101			12	Family 5-MDL086	4.87
13	Family 4-MDL039			Family 2-MDL175			Family 5-MDL035			Family 8-MDL060			Family 8-MDL159			13	Family 4-MDL150	5.27
14	Family 7-MDL038			Family 3-MDL005			Family 5-MDL155			Family 4-MDL071			Family 2-MDL064			14	Family 6-MDL065	5.35
15	Family 8-MDL154			Family 9-MDL083			Family 9-MDL116			Family 4-MDL160			Family 6-MDL087			15	Family 8-MDL135	5.65
16	Family 6-MDL087			Family 6-MDL108			Family 8-MDL075			Family 9-MDL116			Family 3-MDL041			16	Family 4-MDL100	5.7
17	Family 4-MDL081			Family 8-MDL057			Family 4-MDL160			Family 8-MDL157			Family 5-MDL086			17	Family 4-MDL015	6.05
18	Family 8-MDL101			Family 3-MDL045			Family 7-MDL148			Family 4-MDL132			Family 6-MDL073			18	Family 6-MDL177	6.21
19	Family 1-MDL176			Family 6-MDL059			Family 3-MDL072			Family 4-MDL081			Family 5-MDL035			19	Family 9-MDL068	6.51
20	Family 9-MDL063			Family 6-MDL073			Family 2-MDL061			Family 6-MDL027			Family 9-MDL063			20	Family 2-MDL022	7.02
21	Family 6-MDL137			Family 2-MDL064			Family 8-MDL060			Family 8-MDL036			Family 8-MDL171			21	Family 8-MDL060	7.04
22	Family 1-MDL094			Family 8-MDL101			Family 6-MDL027			Family 3-MDL041			Family 6-MDL111			22	Family 5-MDL035	7.21
23	Family 4-MDL056			Family 8-MDL096			Family 9-MDL063			Family 2-MDL175			Family 8-MDL060			23	Family 6-MDL026	7.29
24	Family 1-MDL119			Family 6-MDL044			Family 4-MDL132			Family 2-MDL061			Family 9-MDL047			24	Family 5-MDL170	7.53
25	Family 8-MDL171			Family 6-MDL111			Family 6-MDL146			Family 4-MDL115			Family 3-MDL003			25	Family 6-MDL010	7.86
