# Supplementary material for: Intraspecific variation for heat stress tolerance in wild emmer-derived durum wheat populations
Source: Front Plant Sci. 2025 Jan 23;16:1523562. doi: 10.3389/fpls.2025.1523562 (PMC11798995; doi:10.3389/fpls.2025.1523562)
Supplement: Supplementary file 7 [file Table5.xlsx]

## Sheet: Sheet1
	Supplementary Table 5. The correlation coefficient between grain yield kg ha-1 and measured traits for the wild emmer derivative families evaluated under optimum condition at Tottori.
	Trait	Family 1	Family 2	Family 3	Family 4	Family 5	Family 6	Family 7	Family 8	Family 9
		Grain yield (kg ha-1)
	DH	0.172597	-0.467662	0.115624	0.394*	0.137532	-0.048	0.503	0.159	0.518
	DM	-0.14796	-0.225314	-0.207146	-0.312863	-0.650798	-0.192	0.544	-0.014	-0.157
	GFD	-0.232897	0.36293	-0.265113	-0.525**	-0.402595	-0.041	-0.34	-0.164	-0.645*
	PHT	0.0908287	-0.166505	0.395634	0.0715743	-0.216442	0.238	-0.165	-0.234	0.404
	CHLH	-0.0246489	-0.171831	-0.123611	0.363906	-0.388893	0.007	0.22	-0.009	0.167
	CHLM	0.309648	-0.600*	-0.0691754	-0.0940252	-0.663584	0.053	0.474	0.267	-0.546
	HI	0.574*	0.778**	0.639**	0.732**	0.927**	0.601**	0.889**	0.698**	0.631*
	SN	0.735**	0.260461	0.367905	0.688**	0.291003	0.253	0.918**	0.425*	0.398
	TKW	0.402793	-0.393704	-0.0268439	0.0951626	-0.383804	0.187	0.770*	0.305	0.328
	BIO	0.824**	0.826**	0.671**	0.848**	0.968**	0.795**	0.944**	0.841**	0.896**
	*and ** significant at the 0.05 and 0.01 levels, respectively (2-tailed). DH, days to heading; DM, days to maturity; GFD, grain filling duration; CHLH, chlorophyll at heading; CHLM, chlorophyll at maturity; BIO, biomass; TKW, thousand kernel weight; HI, harvest index; SN, seed number/spike; PHT, plant height.
