# Supplementary material for: Intraspecific variation for heat stress tolerance in wild emmer-derived durum wheat populations
Source: Front Plant Sci. 2025 Jan 23;16:1523562. doi: 10.3389/fpls.2025.1523562 (PMC11798995; doi:10.3389/fpls.2025.1523562)
Supplement: Supplementary file 8 [file Table6.xlsx]

## Sheet: Sheet1
	Supplementary Table 6.The correlation coefficient between grain yield kg ha-1 and measured traits for the wild emmer derivative families evaluated under optimum condition at Dongola.
	Trait	Family 1	Family 2	Family 3	Family 4	Family 5	Family 6	Family 7	Family 8	Family 9
	Grain yield (kg ha-1)
	DH	0.514	0.315	0.063	-0.03	-0.304	-0.148	0.176	-0.169	0.232
	DM	0.551	0.175	0.091	0.187	-0.239	0.158	0.579	-0.039	-0.255
	GFD	0.139	-0.204	0.028	0.279	0.304	.437**	0.453	0.189	-0.412
	PHT	-0.29	0.395	-0.325	0.355	-0.225	-0.326*	-0.506	0.221	0.437
	CHLH	0.012	-0.379	0.117	0.093	0.372	0.380*	0.494	-0.054	0.348
	CHLM	0.725**	0.128	0.256	0.269	-0.276	-0.111	0.603	-0.082	-0.008
	CTH	-0.068	0.113	0.051	0.088	0.205	0.06	-0.19	-0.273	0.012
	HI	-0.088	0.633**	0.404	0.681**	0.17	0.359*	0.681	0.337	0.256
	SN	0.287	0.093	0.117	0.002	-0.168	0.117	0.286	0.072	0.507
	TKW	0.538	0.043	0.058	0.037	0.851**	0.108	-0.826*	0.152	-0.095
	BIO	0.519	0.008	0.337	0.492**	0.529	0.222	0.433	0.670**	0.493
	*and ** significant at the 0.05 and 0.01 levels, respectively (2-tailed). DH, days to heading; DM, days to maturity; GFD, grain filling duration; CHLH, chlorophyll at heading; CHLM, chlorophyll at maturity; CHLD, chlorophyll degradation; BIO, biomass; TKW, thousand kernel weight; HI, harvest index; SN, seed number/spike; PHT, plant height.
