# Supplementary material for: Intraspecific variation for heat stress tolerance in wild emmer-derived durum wheat populations
Source: Front Plant Sci. 2025 Jan 23;16:1523562. doi: 10.3389/fpls.2025.1523562 (PMC11798995; doi:10.3389/fpls.2025.1523562)
Supplement: Supplementary file 9 [file Table7.xlsx]

## Sheet: Sheet1
	Supplementary Table 7. The correlation coefficient between grain yield kg ha-1 and measured traits for the wild emmer derivative families evaluated under normal sowing date (NSD) in Wad Medani.
	Trait	Family 1	Family 2	Family 3	Family 4	Family 5	Family 6	Family 7	Family 8	Family 9
		Grain yield (kg ha-1)
	DH	0.283	0.068	0.132	-0.136	-0.499	-0.379*	0.318	0.318	-0.021
	DM	0.275	-0.054	0.099	-0.127	-0.672*	-0.287	0.196	0.205	-0.099
	GFD	-0.123	-0.216	0.021	0.08	0.17	0.348*	-0.299	-0.295	-0.133
	PHT	0.107	0.502*	-0.072	0.221	-0.165	0.339*	0.265	0.114	-0.279
	CHLH	-0.224	-0.706**	0.08	0.045	0.053	-0.034	-0.035	0.004	-0.282
	CHLM	0.152	0.072	-0.17	-0.165	-0.021	-0.083	-0.235	0.29	-0.138
	CHLD	-0.294	-0.467	0.216	0.239	0.045	-0.238	0.397	-0.132	-0.111
	CTH	-0.295	-0.424	-0.424	-0.173	-0.077	-0.658**	-0.601	-0.353*	-0.289
	HI	0.394	0.605*	0.753**	0.477*	0.746*	0.785**	0.894**	0.684**	0.285
	SN	0.016	0.324	0.377	0.641**	-0.209	0.547**	0.327	-0.091	0.054
	TKW	0.23	0.066	0.349	0.355	0.581	0.465**	0.329	-0.031	0.227
	BIO	0.785**	0.827**	0.277	0.444*	0.846**	0.587**	0.129	0.505**	0.661*
	STI1-GY	0.824**	0.937**	0.834**	0.724**	0.955**	0.907**	0.905**	0.837**	0.850**
	*and ** significant at the 0.05 and 0.01 levels, respectively (2-tailed). DH, days to heading; DM, days to maturity; GFD, grain filling duration; PHT, plant height; CHLH, chlorophyll at heading; CHLM, chlorophyll at maturity; CHLD, chlorophyll degradation; CTH, canopy temperature at heading; HI, harvest index; SN, seed number/spike;TKW, thousand kernel weight; BIO, biomass; STI1-GY, stress tolera…
