# Supplementary material for: Intraspecific variation for heat stress tolerance in wild emmer-derived durum wheat populations
Source: Front Plant Sci. 2025 Jan 23;16:1523562. doi: 10.3389/fpls.2025.1523562 (PMC11798995; doi:10.3389/fpls.2025.1523562)
Supplement: Supplementary file 10 [file Table8.xlsx]

## Sheet: Sheet1
	Supplementary Table 8. The correlation coefficient between grain yield kg ha-1 and measured traits for the wild emmer derivative families evaluated under late sowing date (LSD) in Wad Medani.
		Family 1	Family 2	Family 3	Family 4	Family 5	Family 6	Family 7	Family 8	Family 9
		Grain yield (kg ha-1)
	DH	-0.314	-0.131	-0.092	-0.274	-0.415	-0.265	0.316	-0.274	-0.321
	DM	-0.234	0.106	-0.044	-0.198	-0.062	-0.194	0.27	-0.22	-0.680*
	GFD	0.227	0.515*	0.095	0.193	0.646	0.221	-0.274	0.117	-0.187
	PHT	0.34	-0.277	-0.045	-0.35	0.069	0.063	0.242	0.258	0.529
	CHLH	-0.089	0.253	0.148	-0.191	-0.3	-0.235	0.274	-0.229	-0.052
	CHLM	-0.03	-0.111	0.181	0.075	0.239	-0.186	0.232	0.287	0.513
	CHLD	0.045	0.103	0.104	-0.117	0.097	0.237	0.111	-0.068	-0.483
	CTH	-0.033	-0.405	-0.512*	-0.398*	-0.162	-0.278	-0.365	-0.175	0.226
	HI	0.103	0.013	0.881**	0.441*	0.824**	0.358*	0.674	0.536**	0.793**
	SN	0.003	0.172	-0.168	0.011	0.712*	0.238	0.2	0.162	0.763**
	TKW	0.151	0.128	0.407	0.465*	0.199	0.316	-0.057	0.349*	0.204
	BIO	0.798**	0.787**	0.708**	0.734**	0.897**	0.801**	0.432	0.921**	0.818**
	STI2-GY	0.818**	0.915**	0.847**	0.842**	0.791*	0.902**	0.71	0.823**	0.984**
	*and ** significant at the 0.05 and 0.01 levels, respectively (2-tailed). DH, days to heading; DM, days to maturity; GFD, grain filling duration; PHT, plant height; CHLH, chlorophyll at heading; CHLM, chlorophyll at maturity; CHLD, chlorophyll degradation; CTH, canopy temperature at heading; HI, harvest index; SN, seed number/spike; TKW, thousand kernel weight; BIO, biomass; STI2-GY, stress toler…
