# Supplementary material for: Intraspecific variation for heat stress tolerance in wild emmer-derived durum wheat populations
Source: Front Plant Sci. 2025 Jan 23;16:1523562. doi: 10.3389/fpls.2025.1523562 (PMC11798995; doi:10.3389/fpls.2025.1523562)
Supplement: Supplementary file 11 [file Table9.xlsx]

## Sheet: Sheet1
Supplementary Table 9. Investigation of wild emmer wheat and recurrent parent 'Miki 3' alleles contributions to the tolerant lines in families 6, 8 and 9 by using significant markers for traits distinguish tolerant lines from susceptible ones identified under normal sowing date (NSD) or late sowing date (LSD) in Wad Medani, Sudan.
				Family 6																		Family 8													Family 9
Marker	Chromosome	Trait	Environment	MDL021	MDL027	MDL044	MDL058	MDL059	MDL065	MDL073	MDL085	MDL087	MDL088	MDL098	MDL106	MDL111	MDL113	MDL149	MDL177	MDL180	MDL182	MDL028	MDL036	MDL046	MDL048	MDL051	MDL052	MDL097	MDL089	MDL134	MDL157	MDL159	MDL164	MDL171	MDL063	MDL066	MDL082	MDL112	MDL116	MDL117	MDL181
#rs100105743	7A	HI	NSD	√	‒	‒	‒	‒	√	‒	‒	‒	√	‒	‒	√	‒	‒	√	‒	‒	‒	‒		‒	‒	‒	‒	‒	‒	‒	‒	‒	‒	‒	‒	‒	‒	‒	‒	‒
#rs3021975	2B			‒	‒	‒	‒	‒	‒	‒	‒	‒	√	‒	‒	√	‒	‒	‒	‒	‒	‒	√	√	‒	‒	‒	‒	‒	‒	‒	‒	√	‒	‒	‒	‒	‒	‒	‒	‒
#rs1697382	2B			‒	‒	‒	‒	‒	‒	‒	‒	‒	√	‒	‒	√	‒	‒	‒	‒	‒	‒	‒	‒	‒	‒	‒	‒	‒	‒	‒	‒	‒	‒	‒	‒	‒	‒	‒	‒	‒
#rs1136582	2B			‒	‒	‒	‒	‒	‒	‒	‒	‒	√	‒	‒	√	‒	‒	‒/√	‒	‒	‒	√	‒	‒	‒	‒	‒	‒	‒	‒	‒	√	‒	‒	‒	‒	‒	‒	‒	‒
#rs4993724	2B			‒	‒	‒	‒	‒	‒	‒	‒	‒	√	‒	‒	√	‒	‒	‒	‒	‒	‒	‒	‒	‒	‒	‒	‒	‒	‒	‒	‒	‒	‒	‒	‒	‒	‒	‒	‒	‒
#rs11225454	2B			‒	‒	‒	‒	‒	‒	‒	‒	‒	‒	‒	‒	‒	‒	‒	‒	‒	‒	‒	√	‒	‒	‒	‒	‒	‒	‒	‒	‒	‒	‒	‒	‒	‒	‒	‒	‒	‒
#rs981649	2B			‒	‒	‒	‒	‒	‒	‒	‒	‒	√	‒	‒	√	‒	‒	‒	‒	‒	‒	‒	‒	‒	‒	‒	‒	‒	‒	‒	‒	‒	‒	‒	‒	‒	‒	‒	‒	‒
#rs4008104	2A	HI	LSD	√	‒	‒	√	‒	√	‒	√	‒/√	√	‒	‒	√	‒	‒	√	‒	√	‒	‒	‒	‒	‒	‒	‒	‒	‒	‒	‒	‒	‒	‒	‒	‒	‒	‒	‒	‒
#rs1069184	2A			‒	‒	‒	‒	‒	‒	‒	‒	‒	‒	‒	‒	‒	‒	‒	‒	‒	‒	‒	√	‒	‒	‒	‒	‒	‒	‒	‒	‒	‒	‒	‒	‒	‒	‒	‒	‒	‒
#rs1214239	6A			‒	‒	‒	‒	‒	‒	‒	‒	‒	‒	‒	‒	‒	‒	‒	‒	‒	‒	‒	‒	‒	‒	‒	√	√	√		√	√	‒	‒	N	‒	‒	‒	‒	‒	‒
#rs1026385	2B			‒	‒	‒	‒	‒	‒	‒	‒	‒	‒	‒	‒	‒	‒	‒	‒	‒	‒	‒	√	‒	‒	‒	‒	‒	‒	‒	‒	‒	‒	‒	‒	‒	‒	‒	‒	‒	‒
#rs1089242	2B			‒	‒	‒	‒	‒	‒	‒	‒	‒	√	‒	‒	√	‒	‒	‒	‒	‒	‒	√	‒/√	‒	‒	‒	‒	‒	‒	‒	‒	√	‒	‒	‒	‒	‒	‒	‒	‒
#rs7928794	2B			‒	‒	‒	‒	‒	‒	‒	‒	‒	‒	‒	‒	‒	‒	‒	‒	‒	‒	‒	√	‒	‒	‒	‒	‒	‒	‒	‒	‒/√	‒	‒	‒	‒	‒	‒	‒	‒	‒
#rs2277064	2B			‒	‒	‒	N	‒	‒	‒	√	‒/√	√	‒	‒	√	‒	‒	√	‒	‒/√	‒	√	‒	‒	‒	‒	‒	‒	‒	‒	‒	√	‒	‒	‒	‒	‒	‒	‒	‒
#rs1129883	7B			‒	‒	‒	‒	‒	‒	‒	√	√	√	‒	‒	√	‒	‒	‒/√	√	√	‒	‒/√	‒	‒	‒	‒	‒	‒	‒	‒	‒	‒	‒	‒	‒	‒	‒	‒	‒	‒
#rs1071948	7A	CTH	NSD	‒/√	‒/√	‒	‒	‒	‒	‒	‒	‒	‒	‒	‒/√	‒/√	‒	‒	‒	‒/√	‒/√	‒	‒	‒	‒/√	‒	‒/√	‒	‒/√	‒	‒	‒	‒/√	‒	‒	‒	‒	‒	‒	‒	‒
#rs1092612	7A			‒/√	‒/√	‒	‒	‒	‒	‒	‒	‒	‒/√	‒	‒	‒/√	‒	‒	‒	‒/√	‒/√	‒	‒	‒	‒/√	‒	‒/√	‒/√	‒/√	‒	‒	‒	‒/√	‒	‒	‒	‒	‒	‒	‒	‒
#rs1042061	6B			‒	‒	‒	‒	‒	‒	‒	‒	‒	‒	‒	‒	‒	‒	‒	‒	‒	‒	‒	‒	‒	‒	‒	N	‒	‒	‒	‒	‒	‒	‒	‒	‒	‒	‒	‒	‒	‒
#rs2264223	6B			‒	‒	‒	‒	‒	‒	‒	N	‒	N	‒	‒	‒	‒	‒	‒	N	‒	√	‒	‒	‒	‒	√	‒	‒	‒	‒	‒	‒	‒	‒	‒	‒	‒	‒	‒	‒
#rs3961443	7B			√	√	‒	√	√	‒	‒	‒	‒	√		√	√	√	‒	‒	√	√		‒		√	‒	‒/√	‒	√	‒	‒	‒	√		‒	‒	‒	‒	‒	‒	‒
#rs1077507	6A	CTH	LSD	‒	‒	‒	‒	‒	‒	‒	‒	‒	‒	‒	‒	‒	‒	‒	‒/√	‒	‒	‒	‒	‒	‒	‒	‒	‒	‒	‒	‒	‒	‒	‒	‒	‒	‒	√	‒	‒	‒
#rs1204907	6A			‒	‒	‒	‒	‒	‒	‒	‒	‒	‒	‒	‒	‒	‒	‒	‒	‒	‒	‒	‒	‒	‒	‒	N	‒	‒	‒	‒	‒	‒	‒	√	‒	‒	√	‒	‒	√
#rs1672554	3B			√	‒	‒	√	‒	√	‒	√	‒/√	√	‒	‒	‒	‒	‒	‒	√	‒	‒	√	‒/√	‒	√	‒	‒	‒	‒	‒	‒	‒	‒	‒	‒	‒	‒	‒	‒	‒
#rs1062872	1A	CHLM	LSD	‒	‒	‒	‒	‒	‒	‒	‒	‒	‒	‒	‒	√	‒	‒	√	‒	√	‒	‒	‒	‒	‒	‒	‒	‒	‒	‒	‒	‒	‒	‒	‒	‒	‒	‒	‒	‒
#rs5411136	3A	BIO	LSD	‒	√	‒	‒	‒	√	‒	√	‒	‒	‒	‒	‒	‒	‒	‒	‒	‒	‒	N	‒	‒	N	‒	‒	‒	‒	‒	‒	‒	‒	‒	‒	‒	‒	‒	‒	N
#rs984212	3A			‒	‒	‒	‒	‒	‒	‒	‒	‒	‒	‒	‒	‒	‒	‒	‒	‒	‒	‒	‒	‒	‒	‒	‒	‒	‒/√	‒	‒	‒	‒	‒	‒	‒	‒	‒	‒	‒	‒
#rs1001418	3A			‒	√	‒	‒	‒	√	‒	√	‒/√	‒	‒	‒	‒	‒	‒	‒	‒	‒	‒	‒	‒	‒	‒	‒	‒	‒	‒	‒	‒	‒	‒	‒	‒	‒	‒	‒	‒	‒
#rs7353920	6B			‒	‒	‒	‒	‒	‒	√	√	‒/√	‒	‒	‒	‒	‒	‒	√	√	‒	‒	‒	‒	‒	‒	‒	‒	‒	‒	‒	‒	‒	‒	‒	‒	‒	‒	‒	‒	‒
BIO, biomass; CHLM, chlorophyll content at maturity; CTH, canopy temperature at heading; HI, harvest index. '‒' indicate the recurrent parent 'Miki 3' allele; "√" the wild emmer allele; "‒/√" heterozygous; "N" unknown.
